# Supplementary material
Source: publisher figshare collection journal article supplement (https://sage.figshare.com/ndownloader/files/20098499)
Supplement: Supplementary file 1 [file 20098499]

**COSTING INFORMATION**

**Costing for each health state in decision analytic model.**

| **ECT Acute Phase Treatment** | |  |
| --- | --- | --- |
|  | **TOTAL*** | **Description** |
| **Direct Costs** |  |  |
| Inpatient Full Course of Tx | 9,006.90 | Full course of inpatient ECT treatment ($25,734)1 applied to 35% of cohort |
| Outpatient per diem | 4,611.75 | Cost for 15 courses of outpatient treatment ($473/treatment), applied to 65% of cohort (OCCI)2 |
| **Indirect Costs** |  |  |
| Caregiver Absenteeism | 489.84 | Assumes caregiver takes half day off to pick up patient, average Ontario weekly salary ($1,004.80) (StatsCan)3 x 15 courses of treatment x proportion outpatient (65%) x estimated unemployment (50%) |
| Transportation | 487.50 | Estimation of traveling and parking costs for both patient and caregiver (outpatients only), $25 per person per trip |
| Antidepressants | 226.30 | 6-month average of all antidepressant drugs (ODF)4 |
| Disability insurance (work) | 3,906.44 | Based on 65% of average Ontario salary($52,260) (StatsCan)3, applies to previously employed cohort only, 3 month amount |
| Disability insurance (ODSP) | 2,330.14 | Average ODSP benefits received in 6 months by those with depression,5 applies to previously unemployed cohort (54%)6 |
| Lost Wages | 20,120.10 | Based on average Ontario salary,3 6 month amount for previously unemployed (54%), 3 month amount for previously employed (46%) |
| **TOTAL** | **35,644.06** | Adjusted to account for retirement, based on proportion of Ontario population 65+ (21%)7 |
| **ECT Recovery Post-Acute** |  |  |
| Direct Costs | 2,838.00 | Assumes tapering of treatments following acute phase, one treatment per month ($473/treatment x 6 treatments)8 |
| **Indirect Costs** |  |  |
| Antidepressants | 226.30 | Average of all antidepressant drugs4 |
| Disability insurance | 2,330.14 | Average ODSP benefits received in 6 months by those with depression, applies to unemployed cohort (54%)6 |
| Lost Wages | 14,110.20 | Based on average Ontario salary ($52,260)3, applies to unemployed cohort (54%) |
| **TOTAL** | **16,052.17** | Adjusted to account for retirement |
| **rTMS Acute Phase Treatment** | |  |
| **Direct Costs** |  |  |
| Nurse/technician time | 875.70 | Half hour of nurse/technician time per course for 42 courses ($41.70/hour)8 |
| Psychiatric expert | 3,608,64 | Assumption of OHIP fee code for procedure equivalent to that of ECT8 for 42 courses of treatment |
| Cost of machine | 115.50 | Assumes Magstim machine ($80,000 cost, $5,000 import fee) divided by average 2,880 session yearly, amortized over 10 y8 |
| **Indirect Costs** |  |  |
| Transportation | 1,050.00 | Estimation of traveling and parking costs for patient for 42 courses of treatment, $25 per trip |
| Antidepressants | 226.30 | Average of all antidepressant drugs4, 6 months |
| Short Term Disability | 3,483.99 | Based on 80% average Ontario salary for one month3 (%52,260 x 80% x 0.083) |
| Disability insurance (ODSP) | 2,330.14 | Average ODSP benefits received in 6 months by those with depression,5 applies to unemployed cohort (54%) |
| Lost Wages | 14,110.20 | Based on average Ontario salary3, applies to unemployed cohort only |
| **TOTAL** | **21,616.36** | Adjusted to account for retirement |

| **ECT Maintenance** |  |  |
| --- | --- | --- |
| Outpatient Per Diem | 2,838.00 | Cost for 6 courses of outpatient treatment ($473/treatment x 6 treatments)2 |
| Absenteeism | 1,205.76 | Assumes one day off work per course of treatment ($1,004/5 x 6) |
| Caregiver Absenteeism | 301.20 | Assumes employed caregivers (50%) takes half day off on 6 days ($1,004/10 x 6 treatments) |
| Transportation | 300.00 | Estimation of travel and parking costs for patient and caregiver ($25 x 6 treatments x 2 people) |
| Antidepressants | 226.30 | Average of all antidepressant drugs4 |
| Disability insurance (ODSP) | 3,339.86 | Average ODSP benefits received in 6 months by those with depression5, applies to unemployed cohort (23%)6 |
| Lost Wages | 5,905.38 | Based on average Ontario salary, applies to unemployed cohort (23%)6 |
| **TOTAL** | **11,964.47** | Adjusted to account for retirement |
| **rTMS Maintenance** |  |  |
| Per Session Cost | 1,314.24 | Cost for 12 courses of treatment at $109.52/course8 |
| Transportation | 300.00 | Estimation of traveling and parking costs for patient ($25 x 12 treatments) |
| Antidepressants | 226.30 | Average of all antidepressant drugs4 |
| Absenteeism | 2,411.52 | Assumes one day off work per course of treatment ($1,004/5 x 12 treatments) |
| Disability insurance (ODSP) | 3,339.86 | Average ODSP benefits received in 6 months by those with depression5, applies to unemployed cohort (23%)6 |
| Lost Wages | 5,905.38 | Based on average Ontario salary ($52,260)3, applies to unemployed cohort (23%)6 |
| **TOTAL** | **11,049.38** | Adjusted to account for retirement |
| **Severe Depression** |  |  |
| Antidepressants | **226.30** | Average of all antidepressant drugs4 |
| Disability insurance | 3,184.52 | Average ODSP benefits received in 6 months by those with depression5, applies to unemployed cohort (77%)6 |
| Lost Wages | 19,283.94 | Based on average Ontario salary ($52,260)3, applies to unemployed cohort (77%)6 |
| **TOTAL** | **17,976.38** | Adjusted to account for retirement |
| **Remission** |  |  |
| Antidepressants | 226.30 | Average of all antidepressant drugs4 |
| **TOTAL** | **226.30** |  |

ECT = electroconvulsive therapy; rTMS = repetitive transcranial magnetic stimulation; ODSP = Ontario Disability Support Program; ODF = Ontario Drug Formulary; OCCI = Ontario Case Costing Initiative; CIHI = Canadian Institute for Health Information; StatsCan = Statistics Canada; OHIP = Ontario Health Insurance Plan

*all costs for 6-month period

**References**

1. Canadian Institute for Health Information. Patient Cost Estimator. 2019; <https://www.cihi.ca/en/patient-cost-estimator>. Accessed Jan 18.

2. Ontario Case Costing Initiative (OCCI). 2017. <https://www.ontario.ca/data/ontario-case-costing-initiative-occi>. Accessed Dec 4, 2018.

3. Statistics Canada. Household income in Canada: Key results from the 2016 Census. The Daily2017.

4. Ontario Drug Formulary, 28:16:04 Psychotherapeutic Agents and Antidepressants. 2018. <https://www.formulary.health.gov.on.ca/formulary/results.xhtml?class=281604000&fbclid=IwAR2qtljHalBMxN6_QuGRkHSEp1ZKQuR8bkeXEjYn_V_gFZtDy_7q93Z3CYE>. Accessed December 1, 2018.

5. Ontario Disability Support Program. ODSP Rates for Income Support. <http://www.odsp.info/rates.html>. Accessed Dec 4, 2018.

6. Trades Union Congress. Mental health and employment. <https://www.tuc.org.uk/sites/default/files/Mental_Health_and_Employment.pdf>. Accessed Dec 4, 2018.

7. Statistics Canada. Life Tables, Canada, Provinces and Territories 1980/1982 to 2014/2016. 2018; <https://www150.statcan.gc.ca/n1/pub/84-537-x/84-537-x2018002-eng.htm>

8. Health Quality Ontario. Repetitive Transcranial Magnetic Stimulation for Treatment-Resistant Depression: An Economic Analysis. *Ontario health technology assessment series.* 2016;16:1-51.
